# Supplementary material for: Syntheses and crystal structures of new dinuclear lanthanide complexes based on 3-(4-hydroxyphenyl)propanoic acid: Hirshfeld surface analyses and photoluminescence sensing
Source: Royal Society of Chemistry journal article supplement (doi:10.1039/c9nj02213a), 2019-01-01
Supplement: c9nj02213a1.pdf [file c9nj02213a1.pdf]

## Supporting Information

### **Syntheses and crystal structures of new dinuclear lanthanide complexes based on 3-(4-hydroxyphenyl)propanoic acid: Hirshfeld surface analyses and photoluminescence sensing**

Jiangrong He<sup>a±</sup>, Jun Wang<sup>a\*</sup>, Qiuxia Xu,<sup>b</sup> Xiren Wu<sup>b\*</sup>, Archisman Dutta<sup>c±</sup>, Abhinav  
Kumar<sup>c\*</sup>, Mohd. Muddassir<sup>\*d</sup>, Ahmad Alowais<sup>d</sup> and Naaser A. Y. Abduh<sup>d</sup>

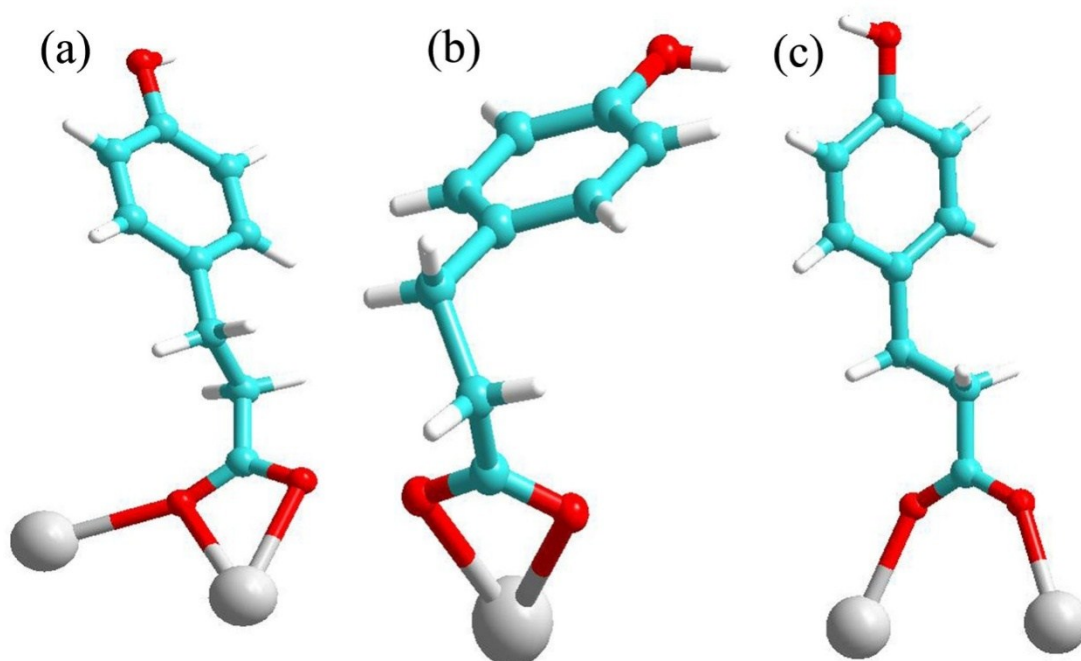

Scheme S1 view of the three types of coordination modes of HPA in this work.

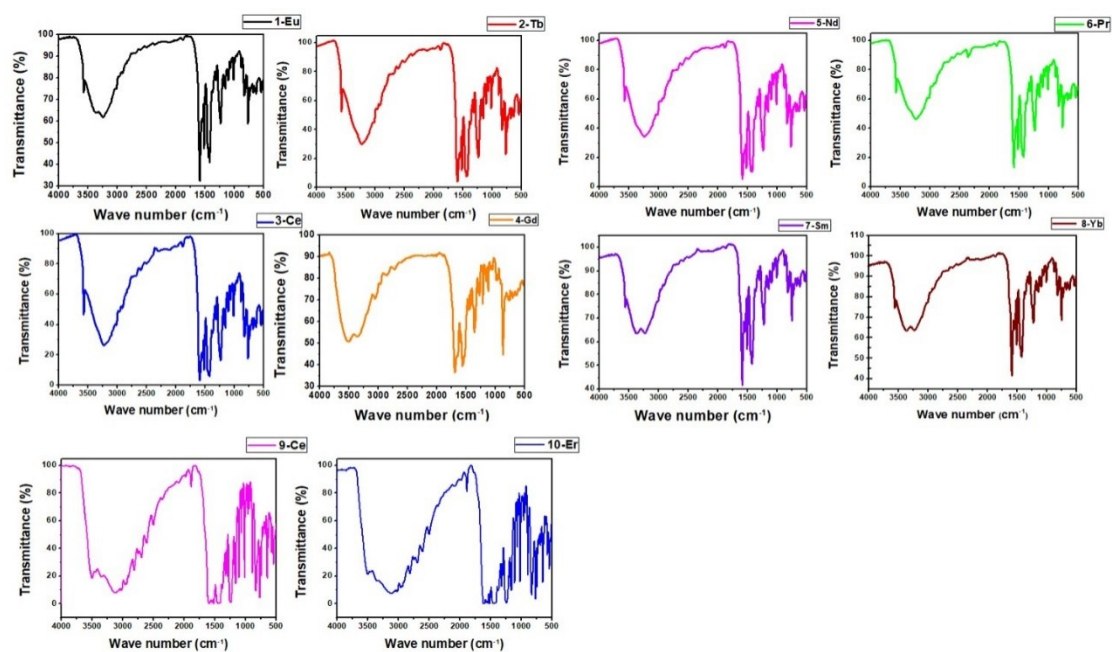

Fig. S1. FTIR spectra for the lanthanide complexes.

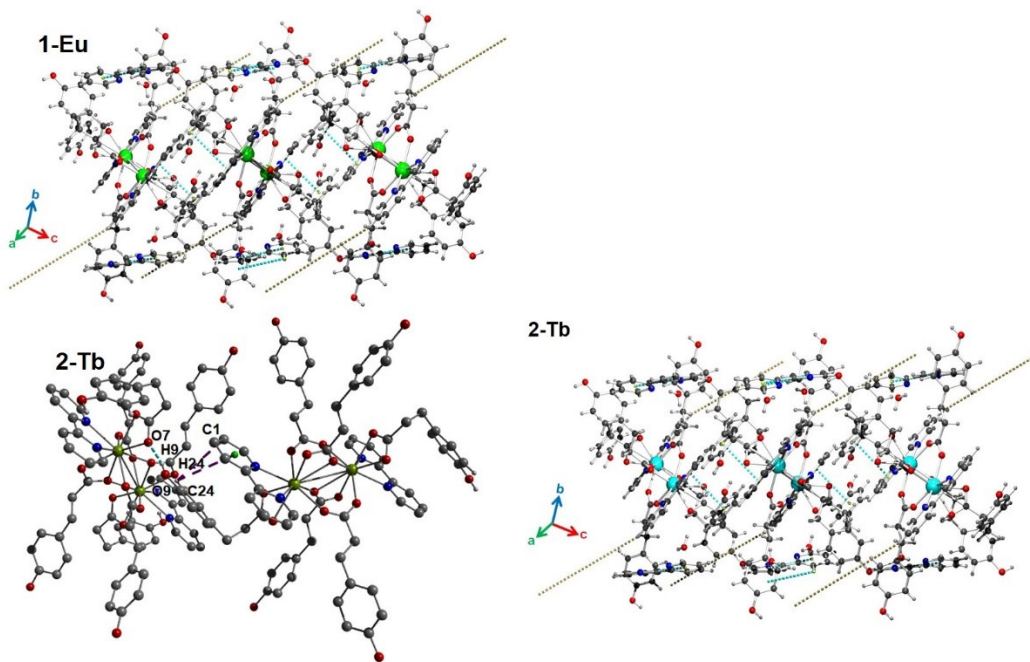

Fig. S2. Intermolecular packing representing O-H...O interaction and C-H... $\pi$ ,  $\pi$ ... $\pi$  interactions for **1** and **2**.

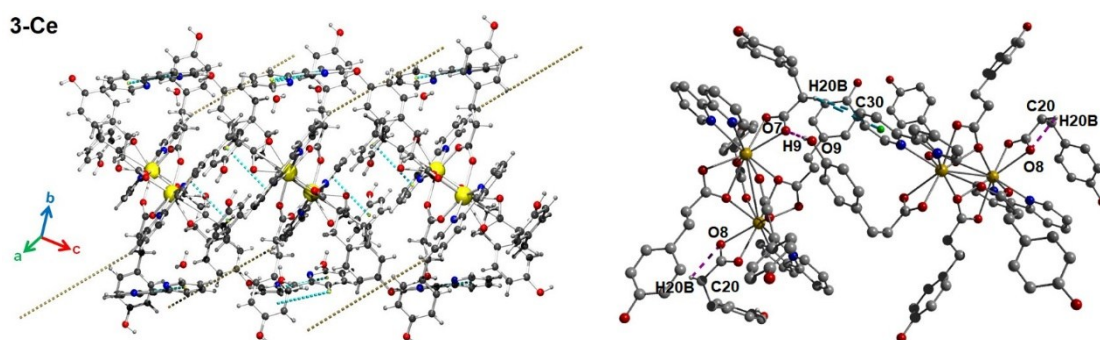

Fig. S3. Intermolecular packing representing O-H...O interaction and C-H... $\pi$ ,  $\pi$ ... $\pi$  interactions for **3**.

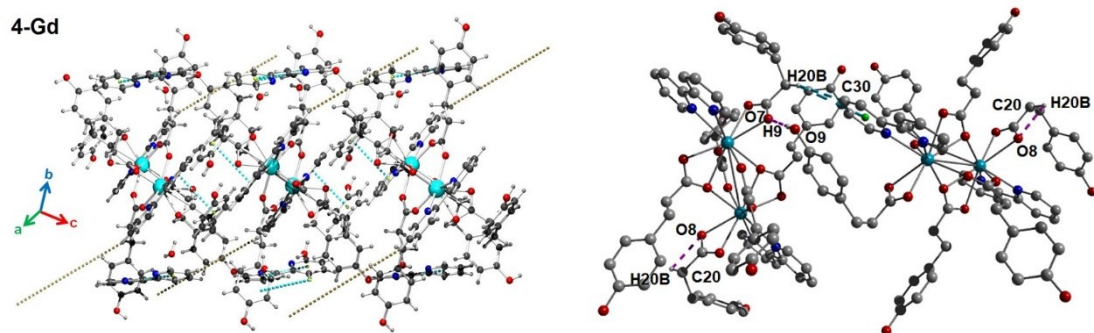

Fig. S4. Intermolecular packing representing O-H...O interaction and C-H... $\pi$ ,  $\pi$ ... $\pi$  interactions for **4**.

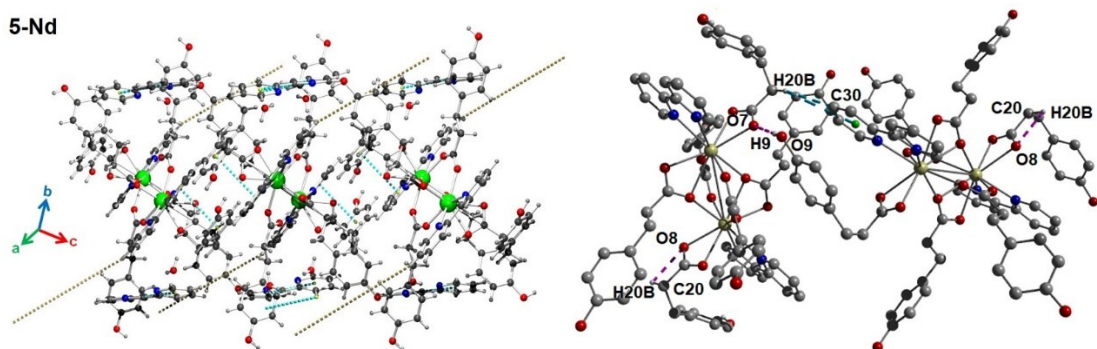

Fig. S5. Intermolecular packing representing O-H...O interaction and C-H... $\pi$ ,  $\pi$ ... $\pi$  interactions for **5**.

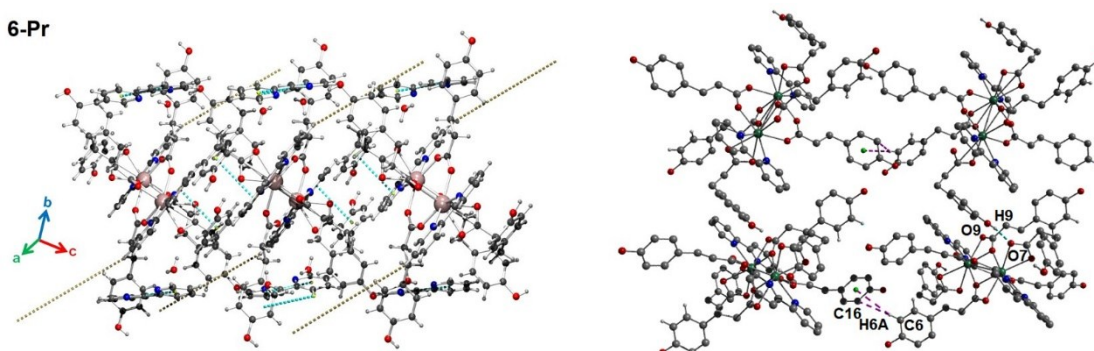

Fig. S6. Intermolecular packing representing O-H...O interaction and C-H... $\pi$ ,  $\pi$ ... $\pi$  interactions for **6**.

7-Sm

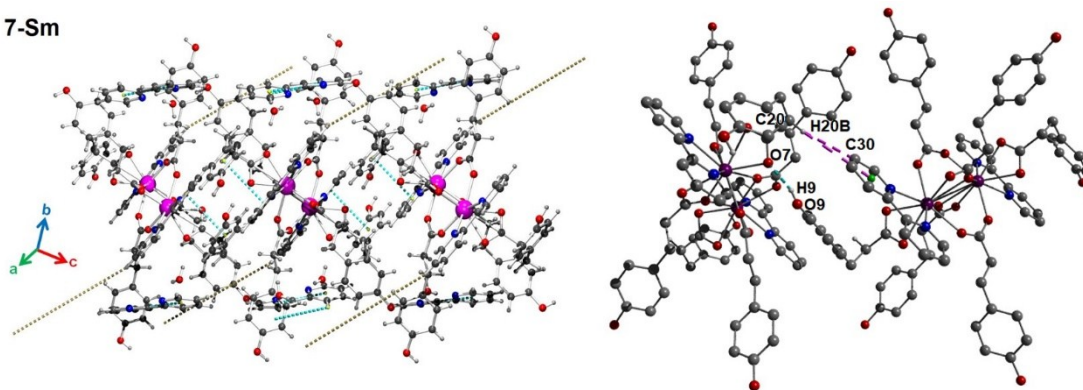

Fig. S7. Intermolecular packing representing O-H...O interaction and C-H... $\pi$ ,  $\pi$ ... $\pi$  interactions for **7**.

8-Yb

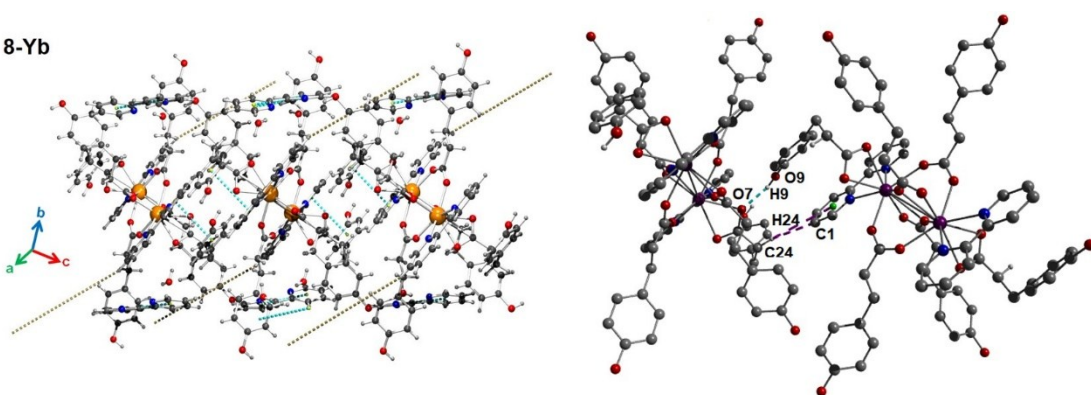

Fig. S8. Intermolecular packing representing O-H...O interaction and C-H... $\pi$ ,  $\pi$ ... $\pi$  interactions for **8**.



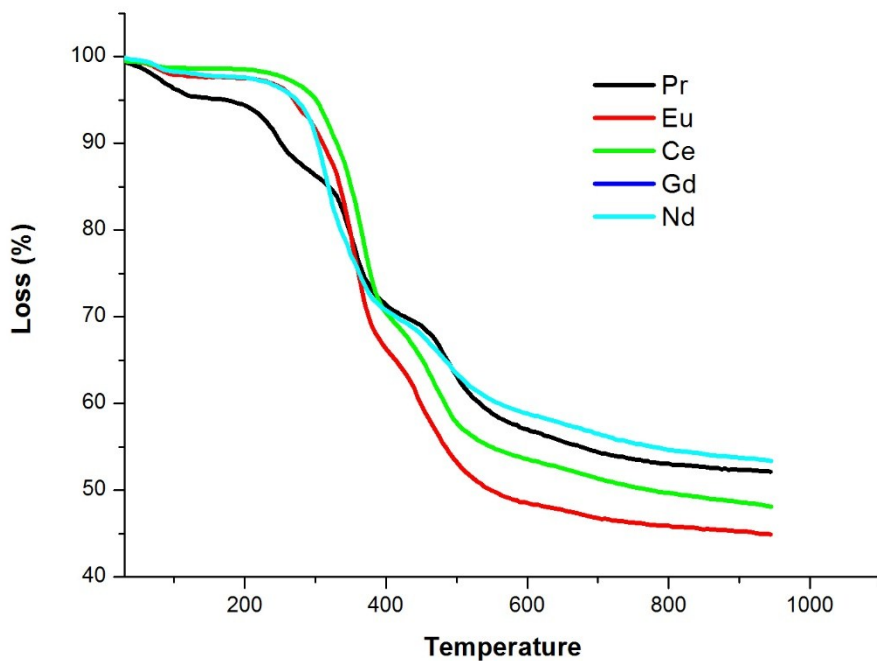

Fig.S9 Thermogravimetric plots for the complexes.

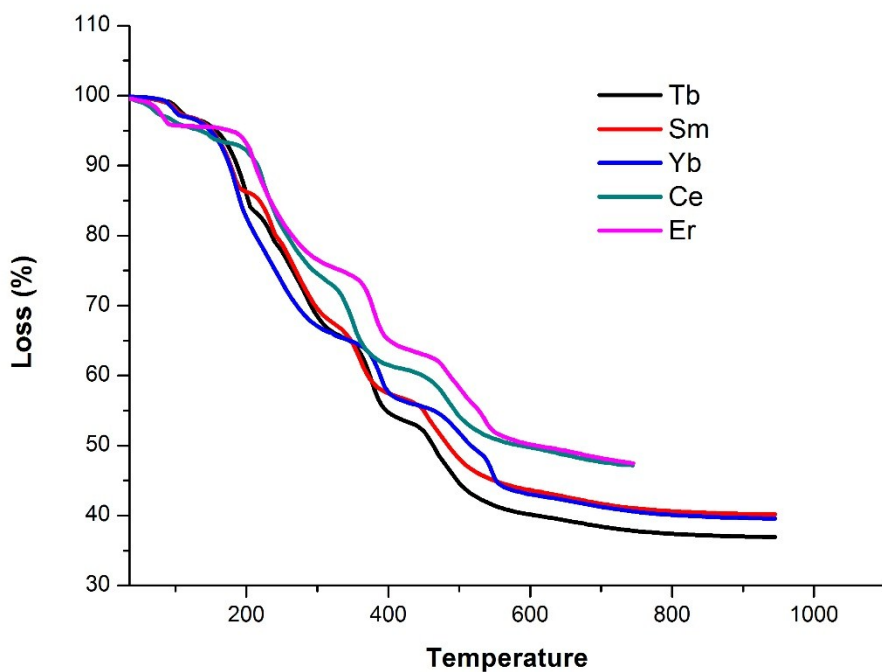

Fig.S10 Thermogravimetric plots for the complexes.

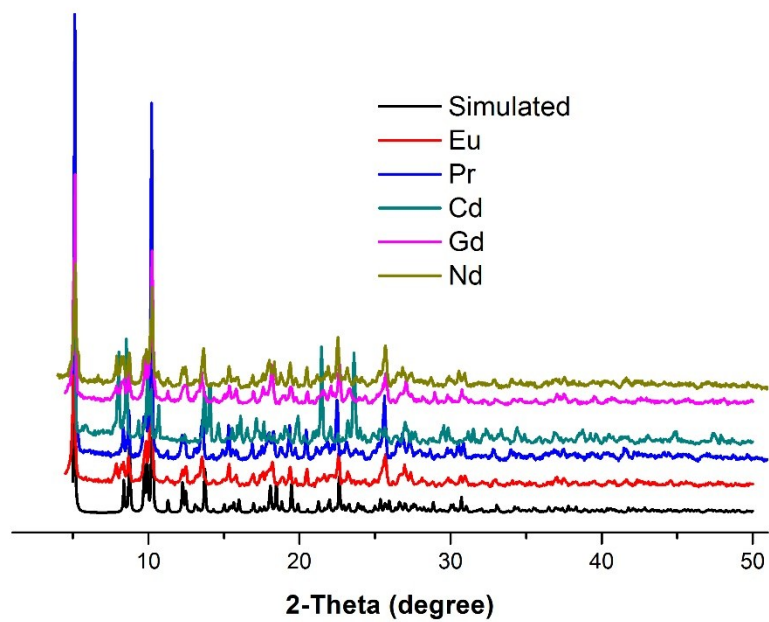

Fig.S11 view of the PXRD pattern for simulated and as-synthesized ones for **1-5**.

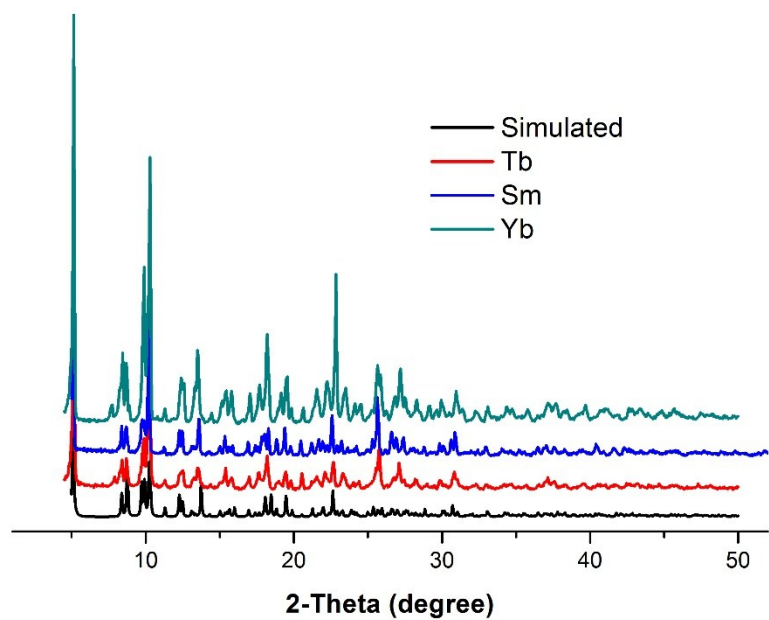

Fig. S12 view of the PXRD patterns of **6-8**.

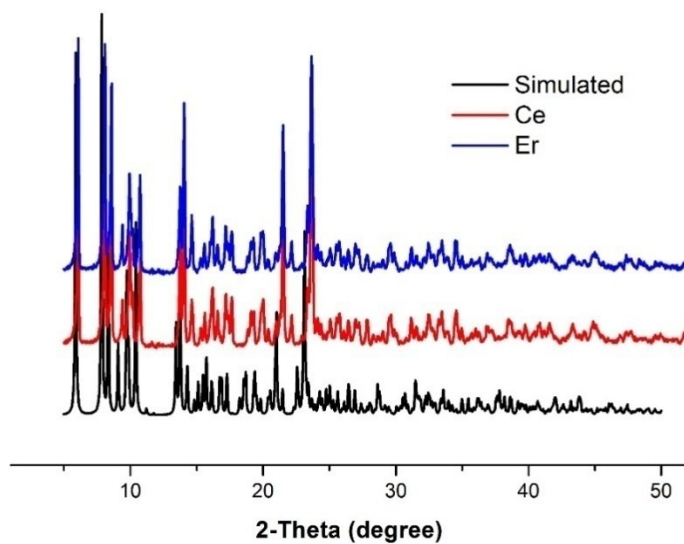

Fig. S13 view of the PXRD patterns of 9-10.

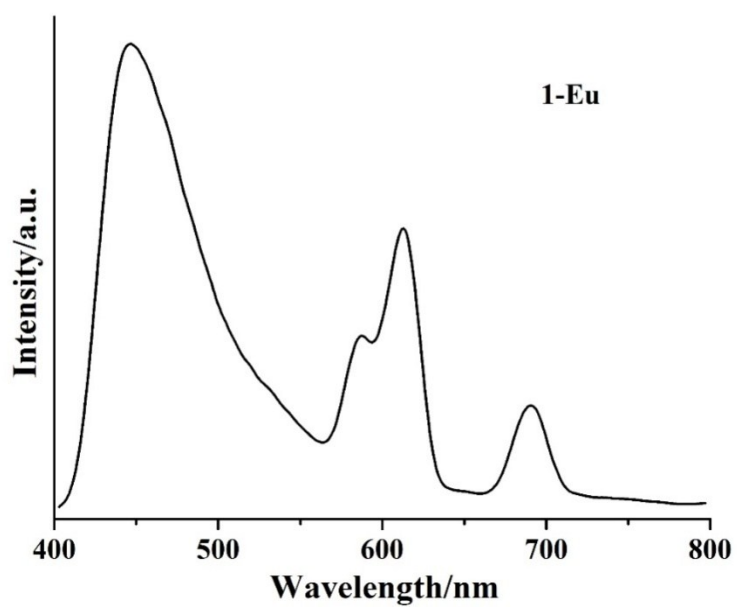

Fig.S14 emission spectrum for complex 1.



**Table S1.** Crystal data and structure refinement information for **1-5**

| Compound                                                                              | <b>1</b>                                                                       | <b>2</b>                                                                       | <b>3</b>                                                                       |
|---------------------------------------------------------------------------------------|--------------------------------------------------------------------------------|--------------------------------------------------------------------------------|--------------------------------------------------------------------------------|
| Empirical formula                                                                     | C <sub>94</sub> H <sub>92</sub> N <sub>8</sub> O <sub>22</sub> Eu <sub>2</sub> | C <sub>94</sub> H <sub>94</sub> N <sub>8</sub> O <sub>22</sub> Tb <sub>2</sub> | C <sub>94</sub> H <sub>94</sub> N <sub>8</sub> O <sub>22</sub> Ce <sub>2</sub> |
| Formula wt                                                                            | 1989.67                                                                        | 2005.61                                                                        | 1968.01                                                                        |
| Crystal system                                                                        | Monoclinic                                                                     | Monoclinic                                                                     | Monoclinic                                                                     |
| space group                                                                           | P2 <sub>1</sub> /c                                                             | P2 <sub>1</sub> /c                                                             | P2 <sub>1</sub> /c                                                             |
| <i>a</i> (Å)                                                                          | 17.2607(8)                                                                     | 17.1988(12)                                                                    | 17.1988(12)                                                                    |
| <i>b</i> (Å)                                                                          | 12.3502(6)                                                                     | 12.2560(9)                                                                     | 12.2560(9)                                                                     |
| <i>c</i> (Å)                                                                          | 20.2823(9)                                                                     | 20.2497(14)                                                                    | 20.2497(14)                                                                    |
| $\alpha$ (deg)                                                                        | 90.00                                                                          | 90.00                                                                          | 90.00                                                                          |
| $\beta$ (deg)                                                                         | 92.0553(7)                                                                     | 92.024(1)                                                                      | 92.024(1)                                                                      |
| $\gamma$ (deg)                                                                        | 90.00                                                                          | 90.00                                                                          | 90.00                                                                          |
| <i>V</i> (Å <sup>3</sup> )                                                            | 4320.9(3)                                                                      | 4265.7(5)                                                                      | 4265.7(5)                                                                      |
| <i>Z</i>                                                                              | 2                                                                              | 2                                                                              | 2                                                                              |
| $\rho_{\text{calc}}$ (g·cm <sup>-3</sup> )                                            | 1.529                                                                          | 1.561                                                                          | 1.532                                                                          |
| $\mu$ (mm <sup>-1</sup> )                                                             | 1.519                                                                          | 1.726                                                                          | 1.135                                                                          |
| <i>F</i> (000)                                                                        | 2028                                                                           | 2040                                                                           | 2012                                                                           |
| $\theta$ Range, deg                                                                   | 2.0-28.6                                                                       | 1.9-28.1                                                                       | 1.9-29.8                                                                       |
| Reflns collected                                                                      | 27287                                                                          | 26468                                                                          | 27955                                                                          |
| Reflns unique                                                                         | 10746                                                                          | 10262                                                                          | 11466                                                                          |
| Independent reflections ( <i>R</i> <sub>int</sub> )                                   | 0.030                                                                          | 0.054                                                                          | 0.059                                                                          |
| <i>R</i> <sub>1</sub> , <i>wR</i> <sub>2</sub> ( <i>I</i> > 2 $\sigma$ ( <i>I</i> ))* | 0.0292, 0.0672                                                                 | 0.0384, 0.0749                                                                 | 0.0489, 0.1242                                                                 |
| <i>R</i> <sub>1</sub> , <i>wR</i> <sub>2</sub> (all data)**                           | 0.0415, 0.0734                                                                 | 0.0680, 0.0855                                                                 | 0.0932, 0.1570                                                                 |

| Compound          | <b>4</b>                                                                       | <b>5</b>                                                                       |
|-------------------|--------------------------------------------------------------------------------|--------------------------------------------------------------------------------|
| Empirical formula | C <sub>94</sub> H <sub>94</sub> N <sub>8</sub> O <sub>22</sub> Gd <sub>2</sub> | C <sub>94</sub> H <sub>94</sub> N <sub>8</sub> O <sub>22</sub> Nd <sub>2</sub> |
| Formula wt        | 2002.27                                                                        | 1976.25                                                                        |
| Crystal system    | Monoclinic                                                                     | Monoclinic                                                                     |
| space group       | P2 <sub>1</sub> /c                                                             | P2 <sub>1</sub> /c                                                             |
| <i>a</i> (Å)      | 17.1988(12)                                                                    | 17.2971(9)                                                                     |

|                                              |                |                |
|----------------------------------------------|----------------|----------------|
| $b$ (Å)                                      | 12.2560(9)     | 12.3645(6)     |
| $c$ (Å)                                      | 20.2497(14)    | 20.2045(10)    |
| $\alpha$ (deg)                               | 90             | 90             |
| $\beta$ (deg)                                | 92.0240(10)    | 92.2910(8)     |
| $\gamma$ (deg)                               | 90             | 90             |
| $V$ (Å <sup>3</sup> )                        | 4265.7(5)      | 4317.7(4)      |
| $Z$                                          | 2              | 2              |
| $\rho_{\text{calc}}$ (g·cm <sup>-3</sup> )   | 1.559          | 1.520          |
| $\mu$ (mm <sup>-1</sup> )                    | 1.623          | 1.270          |
| $F(000)$                                     | 2036           | 2020           |
| $\theta$ Range, deg                          | 1.9-28.5       | 1.9-28.5       |
| Reflns collected                             | 27188          | 26825          |
| Reflns unique                                | 10582          | 10715          |
| Independent reflections ( $R_{\text{int}}$ ) | 0.035          | 0.037          |
| $R_1, wR_2(I > 2\sigma(I))^*$                | 0.0295, 0.0625 | 0.0314, 0.0668 |
| $R_1, wR_2$ (all data)**                     | 0.0457, 0.0692 | 0.0474, 0.0732 |

**Table S1a.** Crystal data and structure refinement information for **6-10**

| Compound                                   | <b>6</b>                                                                       | <b>7</b>                                                                       | <b>8</b>                                                                       |
|--------------------------------------------|--------------------------------------------------------------------------------|--------------------------------------------------------------------------------|--------------------------------------------------------------------------------|
| Empirical formula                          | C <sub>94</sub> H <sub>94</sub> N <sub>8</sub> O <sub>22</sub> Pr <sub>2</sub> | C <sub>94</sub> H <sub>94</sub> N <sub>8</sub> O <sub>22</sub> Sm <sub>2</sub> | C <sub>94</sub> H <sub>94</sub> N <sub>8</sub> O <sub>22</sub> Yb <sub>2</sub> |
| Formula wt                                 | 1969.59                                                                        | 1988.47                                                                        | 2033.85                                                                        |
| Crystal system                             | Monoclinic                                                                     | Monoclinic                                                                     | Monoclinic                                                                     |
| space group                                | P2 <sub>1</sub> /c                                                             | P2 <sub>1</sub> /c                                                             | P2 <sub>1</sub> /c                                                             |
| $a$ (Å)                                    | 17.2971(9)                                                                     | 17.3228(8)                                                                     | 17.3073(9)                                                                     |
| $b$ (Å)                                    | 12.3645(6)                                                                     | 12.3831(5)                                                                     | 12.3374(6)                                                                     |
| $c$ (Å)                                    | 20.2045(10)                                                                    | 20.3030(9)                                                                     | 20.4274(10)                                                                    |
| $\alpha$ (deg)                             | 90                                                                             | 90                                                                             | 90.00                                                                          |
| $\beta$ (deg)                              | 92.2910(8)                                                                     | 92.0594(7)                                                                     | 91.7501(8)                                                                     |
| $\gamma$ (deg)                             | 90                                                                             | 90                                                                             | 90.00                                                                          |
| $V$ (Å <sup>3</sup> )                      | 4317.7(4)                                                                      | 4352.4(3)                                                                      | 4359.8(4)                                                                      |
| $Z$                                        | 2                                                                              | 2                                                                              | 2                                                                              |
| $\rho_{\text{calc}}$ (g·cm <sup>-3</sup> ) | 1.515                                                                          | 1.517                                                                          | 1.549                                                                          |

|                                       |                |                |                |
|---------------------------------------|----------------|----------------|----------------|
| $\mu$ (mm <sup>-1</sup> )             | 1.196          | 1.416          | 2.212          |
| $F(000)$                              | 2016           | 2028           | 2060           |
| $\theta$ Range, deg                   | 1.9-28.6       | 2.0-28.4       | 1.9-28.1       |
| Reflns collected                      | 27593          | 27451          | 26273          |
| Reflns unique                         | 10807          | 10755          | 10302          |
| Independent reflections ( $R_{int}$ ) | 0.038          | 0.028          | 0.033          |
| $R_1, wR_2(I > 2\sigma(I))^*$         | 0.0325, 0.0678 | 0.0262, 0.0607 | 0.0287, 0.0593 |
| $R_1, wR_2$ (all data)**              | 0.0508, 0.0749 | 0.0367, 0.0654 | 0.0447, 0.0648 |

| Compound                              | <b>9</b>                                                                       | <b>10</b>                                                                      |
|---------------------------------------|--------------------------------------------------------------------------------|--------------------------------------------------------------------------------|
| Empirical formula                     | C <sub>74</sub> H <sub>78</sub> N <sub>4</sub> O <sub>22</sub> Ce <sub>2</sub> | C <sub>74</sub> H <sub>78</sub> N <sub>4</sub> O <sub>22</sub> Er <sub>2</sub> |
| Formula wt                            | 1655.64                                                                        | 1709.92                                                                        |
| Crystal system                        | Triclinic                                                                      | Triclinic                                                                      |
| space group                           | P-1                                                                            | P-1                                                                            |
| a (Å)                                 | 11.4683(17)                                                                    | 11.3201(10)                                                                    |
| b (Å)                                 | 12.1254(18)                                                                    | 12.0641(10)                                                                    |
| c (Å)                                 | 15.092(2)                                                                      | 15.0263(12)                                                                    |
| $\alpha$ (deg)                        | 88.418(3)                                                                      | 88.384(1)                                                                      |
| $\beta$ (deg)                         | 95.900(3)                                                                      | 83.721(2)                                                                      |
| $\gamma$ (deg)                        | 111.890(3)                                                                     | 68.535(1)                                                                      |
| V (Å <sup>3</sup> )                   | 1936.9 (5)                                                                     | 1898.2(3)                                                                      |
| Z                                     | 2                                                                              | 2                                                                              |
| $\rho_{calc}$ (g·cm <sup>-3</sup> )   | 1.419                                                                          | 1.496                                                                          |
| $\mu$ (mm <sup>-1</sup> )             | 1.234                                                                          | 2.270                                                                          |
| $F(000)$                              | 842                                                                            | 862                                                                            |
| $\theta$ Range, deg                   | 1.8-28.7                                                                       | 1.9-28.0                                                                       |
| Reflns collected                      | 12150                                                                          | 10968                                                                          |
| Reflns unique                         | 8982                                                                           | 8142                                                                           |
| Independent reflections ( $R_{int}$ ) | 0.062                                                                          | 0.040                                                                          |
| $R_1, wR_2$ ( $I > 2\sigma(I)$ )*     | 0.0853, 0.1912                                                                 | 0.0550, 0.1282                                                                 |

R1, wR2 (all data)\*\*

0.1696, 0.2361

0.0928, 0.1553

**Table S2.** Selected bond distances (Å) and angles (deg) for **1-5**

| <b>1</b>         |            |                  |            |
|------------------|------------|------------------|------------|
| Eu(1)-O(1)       | 2.464(2)   | Eu(1)-O(2)       | 2.5643(18) |
| Eu(1)-O(4)       | 2.3287(17) | Eu(1)-O(7)       | 2.488(2)   |
| Eu(1)-O(8)       | 2.4663(19) | Eu(1)-N(1)       | 2.577(2)   |
| Eu(1)-N(2)       | 2.594(2)   |                  |            |
| O(1)-Eu(1)-O(2)  | 51.07(6)   | O(1)-Eu(1)-O(4)  | 80.23(7)   |
| O(1)-Eu(1)-O(7)  | 143.45(7)  | O(1)-Eu(1)-O(8)  | 141.78(6)  |
| O(1)-Eu(1)-N(1)  | 74.96(7)   | O(1)-Eu(1)-N(2)  | 69.50(7)   |
| O(2)-Eu(1)-O(7)  | 141.13(6)  | O(2)-Eu(1)-O(8)  | 150.71(6)  |
| O(2)-Eu(1)-N(1)  | 120.91(6)  | O(2)-Eu(1)-N(2)  | 109.97(7)  |
| O(2)-Eu(1)-O(4)  | 70.69(6)   | O(4)-Eu(1)-O(7)  | 77.58(6)   |
| O(4)-Eu(1)-O(8)  | 129.33(7)  | O(4)-Eu(1)-N(1)  | 79.13(7)   |
| O(4)-Eu(1)-N(2)  | 135.31(6)  | O(7)-Eu(1)-O(8)  | 51.79(7)   |
| O(7)-Eu(1)-N(1)  | 72.59(7)   | O(7)-Eu(1)-N(2)  | 108.30(7)  |
| O(8)-Eu(1)-N(1)  | 86.61(7)   | O(8)-Eu(1)-N(2)  | 72.29(7)   |
| <b>2</b>         |            |                  |            |
| Tb(1)- O(1)      | 2.428(3)   | Tb(1)-O(2)       | 2.544(2)   |
| Tb(1)- O(4)      | 2.294(2)   | Tb(1)- O(7)      | 2.466(2)   |
| Tb(1)- O(8)      | 2.438(2)   | Tb(1)- N(1)      | 2.539(4)   |
| Tb(1)- N(2)      | 2.562(3)   |                  |            |
| O(1)-Tb(1)-O(2)  | 51.21(8)   | O(1)-Tb(1)-O(4)  | 80.28(9)   |
| O(1)-Tb(1)-O(7)  | 143.37(9)  | O(1)-Tb(1)-O(8)  | 141.79(9)  |
| O(1)-Tb(1)-N(1)  | 75.18(9)   | O(1)-Tb(1)-N(2)  | 69.37(9)   |
| O(2)-Tb(1)- O(4) | 70.79(8)   | O(2)-Tb(1)- O(7) | 140.87(8)  |
| O(2)-Tb(1)- O(8) | 150.26(8)  | O(2)-Tb(1)- N(1) | 121.09(9)  |
| O(2)-Tb(1)- N(2) | 109.79(9)  | O(4)-Tb(1)- O(7) | 77.31(8)   |
| O(4)-Tb(1)- O(8) | 129.49(8)  | O(4)-Tb(1)- N(1) | 78.72(9)   |
| O(4)-Tb(1)-N(2)  | 135.46(9)  | O(7)-Tb(1)-O(8)  | 52.23(8)   |
| O(7)-Tb(1)-N(1)  | 72.29(9)   | O(7)-Tb(1)-N(2)  | 108.76(9)  |
| N(1)-Tb(1)-N(2)  | 62.78(9)   |                  |            |
| <b>3</b>         |            |                  |            |
| Ce(1)-O(1)       | 2.526(4)   | Ce(1)-O(2)       | 2.608(3)   |

|                 |            |                 |            |
|-----------------|------------|-----------------|------------|
| Ce(1)-O(4)      | 2.381(3)   | Ce(1)-O(7)      | 2.564(4)   |
| Ce(1)-O(8)      | 2.520(4)   | Ce(1)-N(1)      | 2.619(4)   |
| Ce(1)-N(2)      | 2.636(4)   |                 |            |
| O(1)-Ce(1)-O(2) | 49.08(10)  | O(1)-Ce(1)-O(4) | 80.88(12)  |
| O(1)-Ce(1)-O(7) | 144.70(12) | O(1)-Ce(1)-O(8) | 142.32(12) |
| O(1)-Ce(1)-N(1) | 75.93(12)  | O(1)-Ce(1)-N(2) | 69.44(11)  |
| O(2)-Ce(1)-O(4) | 71.05(11)  | O(2)-Ce(1)-O(7) | 142.67(10) |
| O(2)-Ce(1)-O(8) | 152.19(10) | O(2)-Ce(1)-N(1) | 120.19(10) |
| O(2)-Ce(1)-N(2) | 108.88(11) | O(4)-Ce(1)-O(7) | 78.05(11)  |
| O(4)-Ce(1)-O(8) | 128.21(12) | O(4)-Ce(1)-N(1) | 79.93(12)  |
| O(4)-Ce(1)-N(2) | 135.10(12) | O(7)-Ce(1)-O(8) | 50.20(11)  |
| N(1)-Ce(1)-N(2) | 61.01(12)  |                 |            |

---

4

---

|                 |            |                 |            |
|-----------------|------------|-----------------|------------|
| Gd(1)-O(1)      | 2.442(2)   | Gd(1)-O(2)      | 2.5513(18) |
| Gd(1)-O(4)      | 2.3115(18) | Gd(1)-O(7)      | 2.4765(19) |
| Gd(1)-O(8)      | 2.4495(18) | Gd(1)-N(1)      | 2.551(2)   |
| Gd(1)-N(2)      | 2.575(2)   |                 |            |
| O(1)-Gd(1)-O(2) | 51.00(6)   | O(1)-Gd(1)-O(4) | 80.14(7)   |
| O(1)-Gd(1)-O(7) | 143.40(7)  | O(1)-Gd(1)-O(8) | 141.89(7)  |
| O(1)-Gd(1)-N(1) | 75.18(7)   | O(1)-Gd(1)-N(2) | 69.62(7)   |
| O(2)-Gd(1)-O(4) | 70.63(6)   | O(2)-Gd(1)-O(7) | 141.01(6)  |
| O(2)-Gd(1)-O(8) | 150.52(6)  | O(2)-Gd(1)-N(1) | 120.97(6)  |
| O(2)-Gd(1)-N(2) | 109.90(6)  | O(4)-Gd(1)-O(7) | 77.51(6)   |
| O(4)-Gd(1)-O(8) | 129.48(6)  | O(4)-Gd(1)-N(1) | 78.94(7)   |
| O(4)-Gd(1)-N(2) | 135.52(7)  | O(7)-Gd(1)-O(8) | 52.02(6)   |
| O(7)-Gd(1)-N(1) | 72.36(7)   | O(7)-Gd(1)-N(2) | 108.51(7)  |
| O(8)-Gd(1)-N(1) | 86.78(7)   | O(8)-Gd(1)-N(2) | 72.28(7)   |
| N(1)-Gd(1)-N(2) | 62.55(7)   |                 |            |

---

5

---

|                 |            |                 |            |
|-----------------|------------|-----------------|------------|
| Nd(1)-O(2)      | 2.500(2)   | Nd(1)-O(2)      | 2.5825(17) |
| Nd(1)-O(4)      | 2.3673(16) | Nd(1)-O(7)      | 2.5179(19) |
| Nd(1)-O(8)      | 2.5053(18) | Nd(1)-N(1)      | 2.607(2)   |
| Nd(1)-N(2)      | 2.627(2)   |                 |            |
| O(1)-Nd(1)-O(2) | 50.22(6)   | O(1)-Nd(1)-O(4) | 80.31(6)   |
| O(1)-Nd(1)-O(7) | 143.96(6)  | O(1)-Nd(1)-O(8) | 141.97(7)  |

|                 |           |                 |           |
|-----------------|-----------|-----------------|-----------|
| O(1)-Nd(1)-N(1) | 75.09(7)  | O(1)-Nd(1)-N(2) | 69.61(7)  |
| O(2)-Nd(1)-O(4) | 70.38(6)  | O(2)-Nd(1)-O(7) | 141.64(6) |
| O(2)-Nd(1)-O(8) | 151.61(6) | O(2)-Nd(1)-N(1) | 120.32(6) |
| O(2)-Nd(1)-N(2) | 109.83(6) | O(4)-Nd(1)-O(7) | 78.02(6)  |
| O(4)-Nd(1)-O(8) | 129.05(6) | O(4)-Nd(1)-N(1) | 79.75(7)  |
| O(4)-Nd(1)-N(2) | 135.19(7) | O(7)-Nd(1)-O(8) | 51.07(6)  |
| N(1)-Nd(1)-N(2) | 61.20(7)  |                 |           |

**Table S2a.** Selected bond distances (Å) and angles (deg) for **6-10**

| <b>6</b>        |            |                 |            |
|-----------------|------------|-----------------|------------|
| Pr(1)-O(1)      | 2.518(2)   | Pr(1)-O(2)      | 2.5958(17) |
| Pr(1)-O(4)      | 2.3780(16) | Pr(1)-O(7)      | 2.5316(19) |
| Pr(1)-O(8)      | 2.5157(18) | Pr(1)-N(1)      | 2.619(2)   |
| Pr(1)-N(2)      | 2.642(2)   |                 |            |
| O(1)-Pr(1)-O(2) | 49.90(6)   | O(1)-Pr(1)-O(4) | 80.23(6)   |
| O(1)-Pr(1)-O(7) | 144.17(6)  | O(1)-Pr(1)-O(8) | 142.09(6)  |
| O(1)-Pr(1)-N(1) | 75.07(7)   | O(1)-Pr(1)-N(2) | 69.73(7)   |
| O(2)-Pr(1)-O(4) | 70.37(6)   | O(2)-Pr(1)-O(7) | 141.90(6)  |
| O(2)-Pr(1)-O(8) | 151.76(6)  | O(2)-Pr(1)-N(1) | 120.08(6)  |
| O(2)-Pr(1)-N(2) | 109.78(6)  | O(4)-Pr(1)-O(7) | 78.25(6)   |
| O(4)-Pr(1)-O(8) | 129.05(6)  | O(4)-Pr(1)-N(1) | 79.84(7)   |
| O(4)-Pr(1)-N(2) | 135.03(7)  | O(7)-Pr(1)-O(8) | 50.83(6)   |
| O(7)-Pr(1)-N(1) | 73.18(6)   | O(7)-Pr(1)-N(2) | 107.61(6)  |
| O(8)-Pr(1)-N(1) | 86.21(7)   | O(8)-Pr(1)-N(2) | 72.36(6)   |
| N(1)-Pr(1)-N(2) | 60.89(7)   |                 |            |
| <b>7</b>        |            |                 |            |
| Sm(1)-O(1)      | 2.4810(18) | Sm(1)-O(2)      | 2.5737(16) |
| Sm(1)-O(4)      | 2.3474(15) | Sm(1)-O(7)      | 2.5046(17) |
| Sm(1)-O(8)      | 2.4858(16) | Sm(1)-N(1)      | 2.5949(19) |
| Sm(1)-N(2)      | 2.6114(19) |                 |            |
| O(1)-Sm(1)-O(2) | 50.77(5)   | O(1)-Sm(1)-O(4) | 80.39(6)   |
| O(1)-Sm(1)-O(7) | 143.63(6)  | O(1)-Sm(1)-O(8) | 141.70(6)  |
| O(1)-Sm(1)-N(2) | 69.58(6)   | O(2)-Sm(1)-O(4) | 70.63(5)   |
| O(2)-Sm(1)-O(7) | 141.29(5)  | O(2)-Sm(1)-N(1) | 120.66(6)  |
| O(2)-Sm(1)-N(2) | 109.94(6)  | O(4)-Sm(1)-O(7) | 77.63(5)   |
| O(4)-Sm(1)-N(1) | 79.30(6)   | O(4)-Sm(1)-N(2) | 135.44(5)  |



|                 |           |                 |          |
|-----------------|-----------|-----------------|----------|
| O(7)-Sm(1)-N(2) | 108.15(6) | O(8)-Sm(1)-N(2) | 72.13(6) |
| N(1)-Sm(1)-N(2) | 61.91(6)  |                 |          |

---

**8**

---

|                 |            |                 |           |
|-----------------|------------|-----------------|-----------|
| Yb(1)-O(1)      | 2.385(2)   | Yb(1)-O(2)      | 2.564(2)  |
| Yb(1)-O(5)      | 2.2627(18) | Yb(1)-O(7)      | 2.448(2)  |
| Yb(1)-O(8)      | 2.408(2)   | Yb(1)-N(1)      | 2.517(2)  |
| Yb(1)-N(2)      | 2.543(2)   |                 |           |
| O(1)-Yb(1)-O(2) | 51.86(6)   | O(1)-Yb(1)-O(4) | 80.10(7)  |
| O(1)-Yb(1)-O(7) | 143.21(7)  | O(1)-Yb(1)-O(8) | 141.48(7) |
| O(1)-Yb(1)-N(1) | 75.38(8)   | O(1)-Yb(1)-N(2) | 69.46(7)  |
| O(2)-Yb(1)-O(4) | 70.34(7)   | O(2)-Yb(1)-O(7) | 139.84(6) |
| O(2)-Yb(1)-O(8) | 149.55(6)  | O(2)-Yb(1)-N(1) | 121.41(7) |
| O(2)-Yb(1)-N(2) | 110.27(7)  | O(4)-Yb(1)-O(7) | 77.06(7)  |
| O(4)-Yb(1)-O(8) | 130.31(7)  | O(7)-Yb(1)-N(1) | 71.93(7)  |
| O(7)-Yb(1)-N(2) | 109.38(7)  | O(7)-Yb(1)-O(8) | 53.29(7)  |
| N(1)-Yb(1)-N(2) | 64.02(8)   |                 |           |

---

**9**

---

|                 |           |                 |          |
|-----------------|-----------|-----------------|----------|
| Ce(1)-O(1)      | 2.494(7)  | Ce(1)-O(4)      | 2.611(7) |
| Ce(1)-O(5)      | 2.705(7)  | Ce(1)-O(7)      | 2.585(7) |
| Ce(1)-O(8)      | 2.655(6)  | Ce(1)-N(1)      | 2.702(8) |
| Ce(1)-N(1)      | 2.759(10) |                 |          |
| O(1)-Ce(1)-O(4) | 84.3(2)   | O(1)-Ce(1)-O(5) | 122.1(2) |
| O(1)-Ce(1)-O(7) | 93.7(2)   | O(1)-Ce(1)-N(1) | 139.6(3) |
| O(1)-Ce(1)-N(2) | 79.2(3)   | O(4)-Ce(1)-O(5) | 49.6(2)  |
| O(4)-Ce(1)-O(7) | 143.9(3)  | O(4)-Ce(1)-N(1) | 82.8(2)  |
| O(5)-Ce(1)-O(7) | 144.1(2)  | O(5)-Ce(1)-O(8) | 138.6(2) |
| O(5)-Ce(1)-N(1) | 75.2(2)   | O(5)-Ce(1)-N(2) | 107.6(3) |
| O(7)-Ce(1)-N(2) | 74.4(2)   | O(8)-Ce(1)-N(1) | 121.0(2) |
| O(8)-Ce(1)-N(2) | 113.4(3)  | N(1)-Ce(1)-N(2) | 60.4(3)  |

---

**10**

---

|                 |           |                 |           |
|-----------------|-----------|-----------------|-----------|
| Er(1)-O(1)      | 2.341(6)  | Er(1)-O(4)      | 2.596(5)  |
| Er(1)-O(5)      | 2.432(6)  | Er(1)-O(7)      | 2.607(5)  |
| Er(1)-O(8)      | 2.471(5)  | Er(1)-N(1)      | 2.583(7)  |
| Er(1)-N(2)      | 2.584(6)  |                 |           |
| O(1)-Er(1)-O(4) | 70.30(17) | O(1)-Er(1)-O(5) | 79.99(19) |

|                 |            |                 |            |
|-----------------|------------|-----------------|------------|
| O(1)-Er(1)-O(7) | 74.82(18)  | O(1)-Er(1)-O(8) | 126.45(19) |
| O(1)-Er(1)-N(1) | 137.7(2)   | O(1)-Er(1)-N(2) | 78.2(2)    |
| O(4)-Er(1)-O(5) | 52.05(18)  | O(4)-Er(1)-O(7) | 136.5(2)   |
| O(4)-Er(1)-O(8) | 151.40(17) | O(4)-Er(1)-N(1) | 114.52(19) |
| O(4)-Er(1)-N(2) | 122.51(19) | O(5)-Er(1)-O(7) | 143.43(17) |
| O(5)-Er(1)-O(8) | 144.2(2)   | O(5)-Er(1)-N(1) | 73.8(2)    |
| O(5)-Er(1)-N(2) | 76.36(18)  | O(7)-Er(1)-O(8) | 51.6(2)    |
| O(8)-Er(1)-N(1) | 70.5(2)    | N(1)-Er(1)-N(2) | 63.8(2)    |

**Table S3.** Selected the hydrogen bond distances (Å) for **1-10**

| Contact D-H...A      | Distance, Å |        |          | Angle<br>D-H...A,<br>deg |
|----------------------|-------------|--------|----------|--------------------------|
|                      | D-H         | H...A  | D...A    |                          |
| <b>1</b>             |             |        |          |                          |
| O(1W)-H(1W1)···N(3)  | 0.8400      | 1.9200 | 2.760(5) | 174.00                   |
| O(3)-H(3)···O(1W)    | 0.8400      | 1.9400 | 2.771(5) | 172.00                   |
| O(2W)-H(2W2)··· O(8) | 0.8500      | 1.9800 | 2.823(3) | 171.00                   |
| O(6)-H(6)···O(2W)    | 0.8400      | 1.8700 | 2.706(3) | 176.00                   |
| O(9)-H(9)··· O(7)    | 0.8400      | 1.9300 | 2.758(3) | 167.00                   |
| <b>2</b>             |             |        |          |                          |
| O(1W)-H(1W1)···N(3)  | 0.8400      | 1.9100 | 2.750(6) | 174.00                   |
| O(3)-H(3)···O(1W)    | 0.8400      | 1.9300 | 2.769(5) | 177.00                   |
| O(2W)-H(2W2)··· O(8) | 0.8500      | 1.9700 | 2.815(4) | 176.00                   |
| O(6)-H(6)···O(2W)    | 0.8400      | 1.8700 | 2.706(4) | 177.00                   |
| O(9)-H(9)··· O(7)    | 0.8400      | 1.9300 | 2.758(4) | 170.00                   |
| <b>3</b>             |             |        |          |                          |
| O(1W)-H(1W1)···N(3)  | 0.8400      | 1.9100 | 2.745(8) | 172.00                   |
| O(3)-H(3)···O(1W)    | 0.8400      | 1.9600 | 2.797(8) | 174.00                   |
| O(2W)-H(2W2)··· O(8) | 0.8500      | 2.0000 | 2.806(5) | 158.00                   |
| O(6)-H(6)···O(2W)    | 0.8400      | 1.8600 | 2.692(6) | 173.00                   |
| O(9)-H(9)··· O(7)    | 0.8400      | 1.9300 | 2.765(5) | 170.00                   |
| <b>4</b>             |             |        |          |                          |
| O(1W)-H(1W1)···N(3)  | 0.8400      | 1.9100 | 2.743(5) | 174.00                   |
| O(3)-H(3)···O(1W)    | 0.8400      | 1.9500 | 2.767(4) | 164.00                   |
| O(2W)-H(2W2)··· O(8) | 0.8500      | 1.9700 | 2.812(3) | 171.00                   |

|                      |        |        |           |        |
|----------------------|--------|--------|-----------|--------|
| O(6)-H(6)···O(2W)    | 0.8400 | 1.8700 | 2.705(3)  | 176.00 |
| O(9)-H(9)··· O(7)    | 0.8400 | 1.9400 | 2.750(3)  | 163.00 |
| <b>5</b>             |        |        |           |        |
| O(1W)-H(1W1)···N(3)  | 0.8400 | 1.9200 | 2.761(4)  | 173.00 |
| O(3)-H(3)···O(1W)    | 0.8400 | 1.9200 | 2.757(5)  | 176.00 |
| O(2W)-H(2W2)··· O(8) | 0.8500 | 1.9600 | 2.807(3)  | 178.00 |
| O(6)-H(6)···O(2W)    | 0.8400 | 1.8600 | 2.695(3)  | 176.00 |
| O(9)-H(9)··· O(7)    | 0.8400 | 1.9500 | 2.763(3)  | 164.00 |
| <b>6</b>             |        |        |           |        |
| O(1W)-H(1W1)···N(3)  | 0.8400 | 1.9100 | 2.753(4)  | 173.00 |
| O(3)-H(3)···O(1W)    | 0.8400 | 1.9300 | 2.768(4)  | 172.00 |
| O(2W)-H(2W2)··· O(8) | 0.8500 | 1.9600 | 2.802(3)  | 173.00 |
| O(6)-H(6)···O(2W)    | 0.8400 | 1.8500 | 2.692(3)  | 174.00 |
| O(9)-H(9)··· O(7)    | 0.8400 | 1.9400 | 2.768(3)  | 168.00 |
| <b>7</b>             |        |        |           |        |
| O(1W)-H(1W1)···N(3)  | 0.8500 | 1.9300 | 2.771(4)  | 173.00 |
| O(3)-H(3)···O(1W)    | 0.8400 | 1.9400 | 2.774(4)  | 175.00 |
| O(2W)-H(2W2)··· O(8) | 0.8500 | 1.9800 | 2.815(2)  | 169.00 |
| O(6)-H(6)···O(2W)    | 0.8400 | 1.8700 | 2.706(3)  | 176.00 |
| O(9)-H(9)··· O(7)    | 0.8400 | 1.9500 | 2.773(3)  | 165.00 |
| <b>8</b>             |        |        |           |        |
| O(1W)-H(1W1)···N(3)  | 0.8500 | 1.9300 | 2.771(5)  | 174.00 |
| O(3)-H(3)···O(1W)    | 0.8400 | 1.9700 | 2.792(5)  | 165.00 |
| O(2W)-H(2W2)··· O(8) | 0.8500 | 2.0100 | 2.857(3)  | 173.00 |
| O(6)-H(6)···O(2W)    | 0.8400 | 1.8900 | 2.729(4)  | 175.00 |
| O(9)-H(9)··· O(7)    | 0.8400 | 1.9400 | 2.769(3)  | 170.00 |
| <b>9</b>             |        |        |           |        |
| O(1W)-H(1W1)···O(6)  | 0.8500 | 2.5600 | 2.936(14) | 108.00 |
| O(3)-H(3)···O(1W)    | 0.8400 | 1.8500 | 2.683(15) | 174.00 |
| O(2W)-H(2W2)··· O(8) | 0.8400 | 2.2600 | 3.020(13) | 151.00 |
| O(6)-H(6)···O(5)     | 0.8200 | 1.9400 | 2.737(12) | 165.00 |
| O(9)-H(9)··· O(4)    | 0.8400 | 1.9800 | 2.753(13) | 153.00 |
| <b>10</b>            |        |        |           |        |
| O(1W)-H(1W1)···O(9)  | 0.8400 | 2.2500 | 2.923(12) | 137.00 |
| O(3)-H(3)···O(1W)    | 0.8400 | 1.9200 | 2.758(13) | 174.00 |

|                      |        |        |           |        |
|----------------------|--------|--------|-----------|--------|
| O(2W)-H(2W2)··· O(6) | 0.8400 | 2.1100 | 2.954(11) | 179.00 |
| O(9)-H(9)··· O(7)    | 0.8400 | 1.9500 | 2.747(10) | 157.00 |

---
